# Supplementary material
Source: Royal Society of Chemistry journal article supplement (doi:10.1039/d6cp00330c)
Supplement: d6cp00330c1.pdf [file d6cp00330c1.pdf]

Supporting Information for

## Monte Carlo Simulations of Ion Correlations and Transport in Highly Concentrated Liquid Electrolytes

Tabita Pothmann, Bernhard Roling

*Department of Chemistry and*

*Marburg Center for Quantum Materials and Sustainable Technologies (mar.quest),*

*University of Marburg, Hans-Meerwein-Strasse 4, 35032 Marburg, Germany*

### Exemplary results for time-dependent transport coefficients

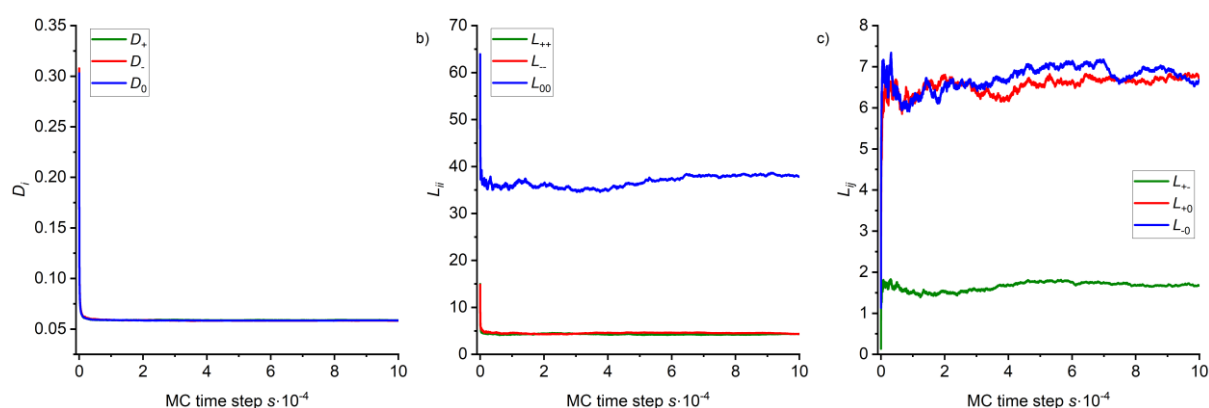

**Fig. S1:** Time-dependent diffusion coefficients and Onsager coefficients for a system with  $1/x = 0.25$  and only hard-core interactions.

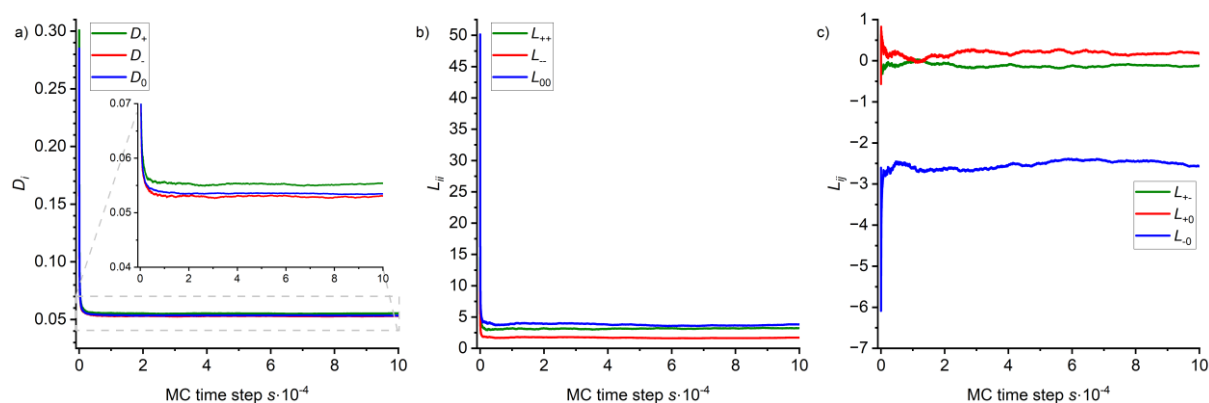

**Fig. S2:** Time-dependent diffusion coefficients and Onsager coefficients for a system with  $1/x = 0.25$ , hard-core interactions, and volume conservation with  $U_{CV} = 1000$  and  $v_0/v_- = 0.67$ .

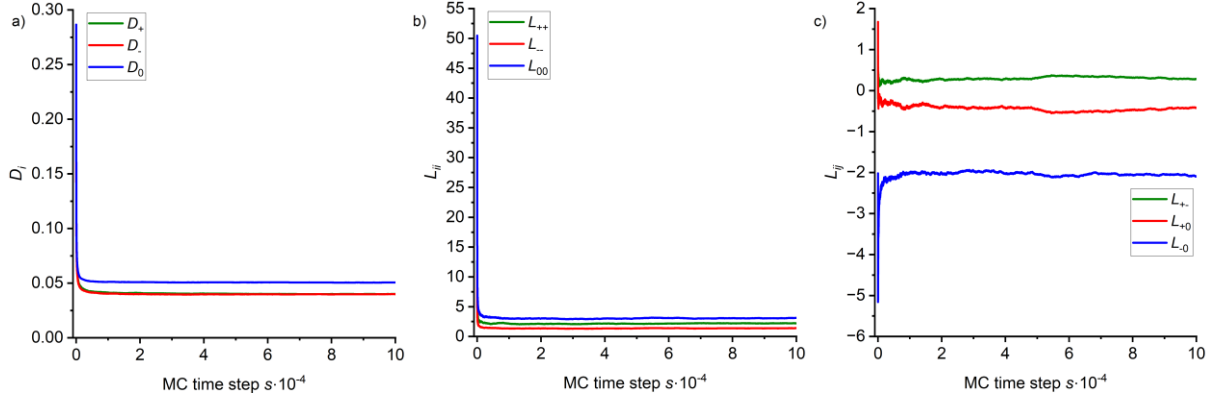

**Fig. S3:** Time-dependent diffusion coefficients and Onsager coefficients for a system with  $1/x = 0.25$ , hard-core interactions, and volume conservation with  $U_{CV} = 1000$  and  $v_0/v_- = 0.67$ , and Coulomb interactions with  $U_{Coul} = 5$ .

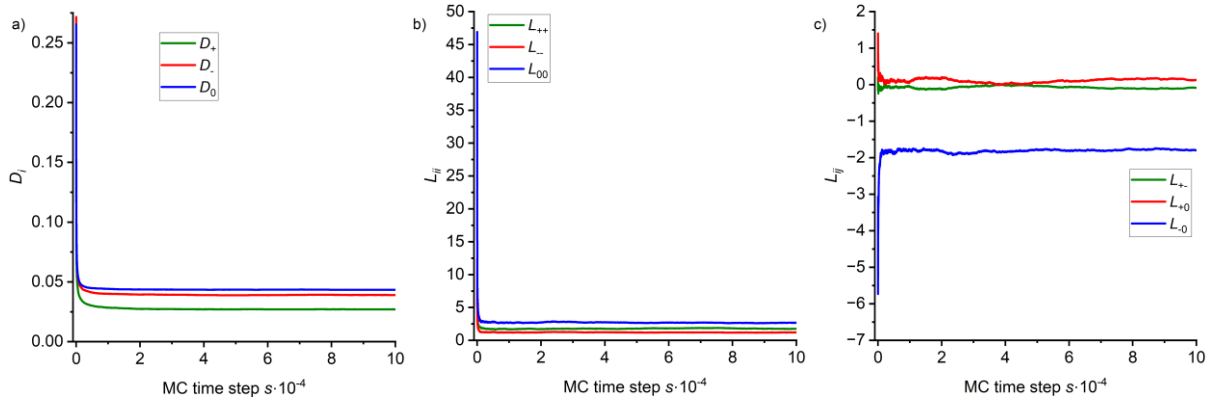

**Fig. S4:** Time-dependent diffusion coefficients and Onsager coefficients for a system with  $1/x = 0.25$ , hard-core interactions, and volume conservation with  $U_{CV} = 1000$  and  $v_0/v_- = 0.67$ , Coulomb interactions with  $U_{Coul} = 5$ , and cation-solvent interactions with  $U_{cat-sol} = -2.5$ .

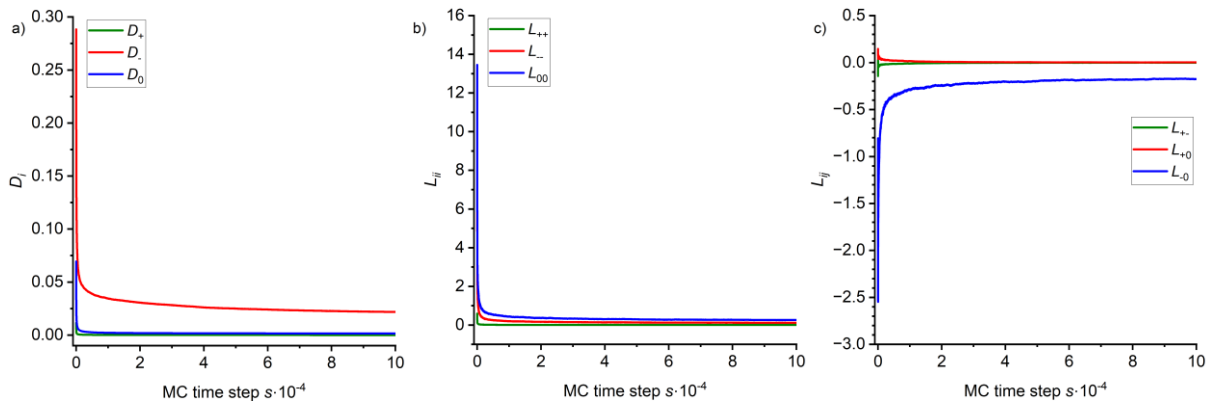

**Fig. S5:** Time-dependent diffusion coefficients and Onsager coefficients for a system with  $1/x = 0.25$ , hard-core interactions, and volume conservation with  $U_{CV} = 1000$  and  $v_0/v_- = 0.67$ , Coulomb interactions with  $U_{Coul} = 5$ , and cation-solvent interactions with  $U_{cat-sol} = -7.0$ .

## Self and distinct parts of Onsager coefficients and jump rates of particles

**Tab. S1:** Self parts of Onsager coefficients for systems with only hard-core interactions.

| $\frac{1}{x}$ | $L_+^{\text{self}}$ | $L_-^{\text{self}}$ | $L_0^{\text{self}}$ |
|---------------|---------------------|---------------------|---------------------|
| 0.1           | $1.40 \pm 0.01$     | $1.39 \pm 0.01$     | $13.99 \pm 0.03$    |
| 0.25          | $2.82 \pm 0.01$     | $2.80 \pm 0.02$     | $11.23 \pm 0.03$    |
| 0.5           | $4.18 \pm 0.02$     | $4.20 \pm 0.02$     | $8.38 \pm 0.03$     |
| 1.0           | $5.60 \pm 0.01$     | $5.64 \pm 0.02$     | $5.59 \pm 0.02$     |

**Tab. S2:** Distinct parts of Onsager coefficients and  $L_{-0}$  for systems with only hard-core interactions.

| $\frac{1}{x}$ | $L_{++}^{\text{distinct}}$ | $L_{--}^{\text{distinct}}$ | $L_{00}^{\text{distinct}}$ | $L_{-0}$      |
|---------------|----------------------------|----------------------------|----------------------------|---------------|
| 0.1           | $0.38 \pm 0.08$            | $0.39 \pm 0.05$            | $41 \pm 2$                 | $3.9 \pm 0.3$ |
| 0.25          | $1.4 \pm 0.2$              | $1.7 \pm 0.2$              | $27 \pm 2$                 | $6.8 \pm 0.5$ |
| 0.5           | $3.9 \pm 0.4$              | $3.9 \pm 0.2$              | $15 \pm 1$                 | $7.7 \pm 0.5$ |
| 1.0           | $5.8 \pm 0.5$              | $6.1 \pm 0.3$              | $5.9 \pm 0.4$              | $6.2 \pm 0.3$ |

**Tab. S3:** Jump rates of particles for systems with only hard-core interactions.

| $\frac{1}{x}$ | jump rate of the cations | jump rate of the anions | jump rate of the solvent |
|---------------|--------------------------|-------------------------|--------------------------|
| 0.1           | $0.33 \pm 0.00$          | $0.33 \pm 0.00$         | $0.33 \pm 0.00$          |
| 0.25          | $0.33 \pm 0.00$          | $0.33 \pm 0.00$         | $0.33 \pm 0.00$          |
| 0.5           | $0.33 \pm 0.00$          | $0.33 \pm 0.00$         | $0.33 \pm 0.00$          |
| 1.0           | $0.33 \pm 0.00$          | $0.33 \pm 0.00$         | $0.33 \pm 0.00$          |

**Tab. S4:** Self parts of Onsager coefficients for systems with hard-core interactions and volume conservation with  $U_{\text{CV}} = 1000$ .

| $\frac{v_0}{v_-}$ | $\frac{1}{x}$ | $L_+^{\text{self}}$ | $L_-^{\text{self}}$ | $L_0^{\text{self}}$ |
|-------------------|---------------|---------------------|---------------------|---------------------|
| 0.67              | 0.1           | $1.31 \pm 0.01$     | $1.27 \pm 0.01$     | $12.87 \pm 0.01$    |
|                   | 0.25          | $2.65 \pm 0.01$     | $2.54 \pm 0.01$     | $10.26 \pm 0.03$    |
|                   | 0.5           | $3.96 \pm 0.02$     | $3.79 \pm 0.02$     | $7.68 \pm 0.02$     |
|                   | 1.0           | $5.26 \pm 0.02$     | $5.02 \pm 0.02$     | $5.12 \pm 0.02$     |
| 0.90              | 0.1           | $1.32 \pm 0.01$     | $1.28 \pm 0.01$     | $12.83 \pm 0.02$    |
|                   | 0.25          | $2.64 \pm 0.02$     | $2.56 \pm 0.01$     | $10.24 \pm 0.02$    |
|                   | 0.5           | $3.93 \pm 0.02$     | $3.83 \pm 0.02$     | $7.67 \pm 0.02$     |
|                   | 1.0           | $5.29 \pm 0.01$     | $5.06 \pm 0.02$     | $5.08 \pm 0.02$     |
| 1.05              | 0.1           | $1.31 \pm 0.01$     | $1.27 \pm 0.01$     | $12.85 \pm 0.03$    |
|                   | 0.25          | $2.66 \pm 0.02$     | $2.58 \pm 0.01$     | $10.23 \pm 0.03$    |
|                   | 0.5           | $3.96 \pm 0.01$     | $3.81 \pm 0.01$     | $7.64 \pm 0.02$     |
|                   | 1.0           | $5.29 \pm 0.02$     | $5.07 \pm 0.01$     | $5.08 \pm 0.01$     |

**Tab. S5:** Distinct parts of Onsager coefficients and  $L_{-0}$  for systems with hard-core interactions and volume conservation with  $U_{CV} = 1000$ .

| $\frac{v_0}{v_-}$ | $\frac{1}{x}$ | $L_{++}^{\text{distinct}}$ | $L_{--}^{\text{distinct}}$ | $L_{00}^{\text{distinct}}$ | $L_{-0}$         |
|-------------------|---------------|----------------------------|----------------------------|----------------------------|------------------|
| 0.67              | 0.1           | $0.20 \pm 0.04$            | $-0.26 \pm 0.03$           | $-10.61 \pm 0.07$          | $-1.51 \pm 0.05$ |
|                   | 0.25          | $0.6 \pm 0.2$              | $-0.88 \pm 0.06$           | $-6.6 \pm 0.1$             | $-2.47 \pm 0.09$ |
|                   | 0.5           | $1.2 \pm 0.2$              | $-1.88 \pm 0.05$           | $-3.4 \pm 0.1$             | $-2.85 \pm 0.07$ |
|                   | 1.0           | $2.2 \pm 0.3$              | $-3.46 \pm 0.05$           | $-1.64 \pm 0.09$           | $-2.33 \pm 0.06$ |
| 0.90              | 0.1           | $0.08 \pm 0.04$            | $-0.15 \pm 0.04$           | $-11.45 \pm 0.06$          | $-1.25 \pm 0.04$ |
|                   | 0.25          | $0.35 \pm 0.09$            | $-0.56 \pm 0.07$           | $-7.77 \pm 0.09$           | $-2.23 \pm 0.08$ |
|                   | 0.5           | $1.0 \pm 0.2$              | $-1.30 \pm 0.08$           | $-4.6 \pm 0.1$             | $-2.80 \pm 0.09$ |
|                   | 1.0           | $1.6 \pm 0.3$              | $-2.84 \pm 0.07$           | $-2.35 \pm 0.09$           | $-2.46 \pm 0.08$ |
| 1.05              | 0.1           | $0.07 \pm 0.04$            | $-0.12 \pm 0.04$           | $-11.81 \pm 0.05$          | $-1.09 \pm 0.04$ |
|                   | 0.25          | $0.5 \pm 0.1$              | $-0.42 \pm 0.09$           | $-8.26 \pm 0.08$           | $-2.06 \pm 0.08$ |
|                   | 0.5           | $0.8 \pm 0.2$              | $-1.07 \pm 0.08$           | $-5.16 \pm 0.07$           | $-2.61 \pm 0.07$ |
|                   | 1.0           | $1.8 \pm 0.3$              | $-2.5 \pm 0.1$             | $-2.75 \pm 0.09$           | $-2.45 \pm 0.09$ |

**Tab. S6:** Jump rates of particles for systems for systems with hard-core-interactions and volume conservation with  $U_{CV} = 1000$ .

| $\frac{v_0}{v_-}$ | $\frac{1}{x}$ | jump rate of the cations | jump rate of the anions | jump rate of the solvent |
|-------------------|---------------|--------------------------|-------------------------|--------------------------|
| 0.67              | 0.1           | $0.33 \pm 0.01$          | $0.30 \pm 0.01$         | $0.31 \pm 0.01$          |
|                   | 0.25          | $0.33 \pm 0.01$          | $0.30 \pm 0.01$         | $0.31 \pm 0.01$          |
|                   | 0.5           | $0.33 \pm 0.01$          | $0.30 \pm 0.01$         | $0.31 \pm 0.01$          |
|                   | 1.0           | $0.33 \pm 0.01$          | $0.30 \pm 0.01$         | $0.31 \pm 0.01$          |
| 0.90              | 0.1           | $0.33 \pm 0.01$          | $0.31 \pm 0.01$         | $0.31 \pm 0.01$          |
|                   | 0.25          | $0.33 \pm 0.01$          | $0.31 \pm 0.01$         | $0.31 \pm 0.01$          |
|                   | 0.5           | $0.33 \pm 0.01$          | $0.30 \pm 0.01$         | $0.31 \pm 0.01$          |
|                   | 1.0           | $0.33 \pm 0.01$          | $0.30 \pm 0.01$         | $0.30 \pm 0.01$          |
| 1.05              | 0.1           | $0.33 \pm 0.01$          | $0.31 \pm 0.01$         | $0.31 \pm 0.01$          |
|                   | 0.25          | $0.33 \pm 0.01$          | $0.31 \pm 0.01$         | $0.31 \pm 0.01$          |
|                   | 0.5           | $0.33 \pm 0.01$          | $0.31 \pm 0.01$         | $0.30 \pm 0.01$          |
|                   | 1.0           | $0.33 \pm 0.01$          | $0.30 \pm 0.01$         | $0.30 \pm 0.01$          |

**Tab. S7:** Self parts of Onsager coefficients for systems with hard-core-interactions, volume conservation with  $U_{CV} = 1000$  and Coulomb interactions with  $U_{Coul} = 5$ .

| $\frac{v_0}{v_-}$ | $\frac{1}{x}$ | $L_+^{\text{self}}$ | $L_-^{\text{self}}$ | $L_0^{\text{self}}$ |
|-------------------|---------------|---------------------|---------------------|---------------------|
| 0.67              | 0.1           | $1.02 \pm 0.01$     | $0.99 \pm 0.01$     | $12.61 \pm 0.01$    |
|                   | 0.25          | $1.92 \pm 0.01$     | $1.91 \pm 0.01$     | $9.71 \pm 0.02$     |
|                   | 0.5           | $2.77 \pm 0.01$     | $2.73 \pm 0.01$     | $6.98 \pm 0.02$     |
|                   | 1.0           | $3.48 \pm 0.01$     | $3.43 \pm 0.01$     | $4.45 \pm 0.02$     |
| 0.90              | 0.1           | $1.02 \pm 0.01$     | $1.00 \pm 0.01$     | $12.51 \pm 0.03$    |
|                   | 0.25          | $1.94 \pm 0.01$     | $1.92 \pm 0.01$     | $9.66 \pm 0.01$     |
|                   | 0.5           | $2.77 \pm 0.01$     | $2.72 \pm 0.01$     | $7.00 \pm 0.01$     |
|                   | 1.0           | $3.50 \pm 0.02$     | $3.44 \pm 0.01$     | $4.42 \pm 0.01$     |
| 1.05              | 0.1           | $1.02 \pm 0.01$     | $1.01 \pm 0.01$     | $12.58 \pm 0.03$    |

|      |                 |                 |                 |
|------|-----------------|-----------------|-----------------|
| 0.25 | $1.94 \pm 0.01$ | $1.93 \pm 0.01$ | $9.69 \pm 0.04$ |
| 0.5  | $2.77 \pm 0.02$ | $2.75 \pm 0.01$ | $6.97 \pm 0.02$ |
| 1.0  | $3.49 \pm 0.01$ | $3.44 \pm 0.01$ | $4.41 \pm 0.02$ |

**Tab. S8:** Distinct parts of Onsager coefficients and  $L_{-0}$  for systems with hard-core-interactions, volume conservation with  $U_{CV} = 1000$  and Coulomb interactions with  $U_{Coul} = 5$ .

| $\frac{v_0}{v_-}$ | $\frac{1}{\chi}$ | $L_{++}^{\text{distinct}}$ | $L_{--}^{\text{distinct}}$ | $L_{00}^{\text{distinct}}$ | $L_{-0}$         |
|-------------------|------------------|----------------------------|----------------------------|----------------------------|------------------|
| 0.67              | 0.1              | $0.04 \pm 0.03$            | $-0.08 \pm 0.04$           | $-10.59 \pm 0.08$          | $-1.35 \pm 0.06$ |
|                   | 0.25             | $0.30 \pm 0.07$            | $-0.54 \pm 0.05$           | $-6.7 \pm 0.1$             | $-2.05 \pm 0.07$ |
|                   | 0.5              | $0.4 \pm 0.1$              | $-1.13 \pm 0.07$           | $-3.4 \pm 0.2$             | $-2.4 \pm 0.1$   |
|                   | 1.0              | $0.59 \pm 0.07$            | $-2.19 \pm 0.05$           | $-1.7 \pm 0.1$             | $-1.85 \pm 0.08$ |
| 0.90              | 0.1              | $0.11 \pm 0.04$            | $-0.04 \pm 0.02$           | $-11.33 \pm 0.04$          | $-1.06 \pm 0.03$ |
|                   | 0.25             | $0.23 \pm 0.09$            | $-0.35 \pm 0.05$           | $-7.72 \pm 0.07$           | $-1.74 \pm 0.06$ |
|                   | 0.5              | $0.56 \pm 0.07$            | $-0.87 \pm 0.07$           | $-4.72 \pm 0.09$           | $-2.05 \pm 0.08$ |
|                   | 1.0              | $1.1 \pm 0.2$              | $-1.70 \pm 0.06$           | $-2.28 \pm 0.08$           | $-1.93 \pm 0.07$ |
| 1.05              | 0.1              | $0.06 \pm 0.03$            | $-0.07 \pm 0.04$           | $-11.72 \pm 0.05$          | $-0.89 \pm 0.04$ |
|                   | 0.25             | $0.31 \pm 0.07$            | $-0.18 \pm 0.08$           | $-8.10 \pm 0.08$           | $-1.66 \pm 0.07$ |
|                   | 0.5              | $0.5 \pm 0.1$              | $-0.61 \pm 0.04$           | $-5.02 \pm 0.04$           | $-2.04 \pm 0.04$ |
|                   | 1.0              | $0.9 \pm 0.1$              | $-1.35 \pm 0.07$           | $-2.52 \pm 0.07$           | $-1.99 \pm 0.07$ |

**Tab. S9:** Jump rates of particles for systems with hard-core-interactions, volume conservation with  $U_{CV} = 1000$  and Coulomb interactions with  $U_{Coul} = 5$ .

| $\frac{v_0}{v_-}$ | $\frac{1}{\chi}$ | jump rate of the cations | jump rate of the anions | jump rate of the solvent |
|-------------------|------------------|--------------------------|-------------------------|--------------------------|
| 0.67              | 0.1              | $0.29 \pm 0.01$          | $0.28 \pm 0.01$         | $0.31 \pm 0.01$          |
|                   | 0.25             | $0.29 \pm 0.01$          | $0.27 \pm 0.01$         | $0.31 \pm 0.01$          |
|                   | 0.5              | $0.28 \pm 0.01$          | $0.27 \pm 0.01$         | $0.31 \pm 0.01$          |
|                   | 1.0              | $0.28 \pm 0.01$          | $0.27 \pm 0.01$         | $0.31 \pm 0.01$          |
| 0.90              | 0.1              | $0.29 \pm 0.01$          | $0.28 \pm 0.01$         | $0.31 \pm 0.01$          |
|                   | 0.25             | $0.29 \pm 0.01$          | $0.28 \pm 0.01$         | $0.31 \pm 0.01$          |
|                   | 0.5              | $0.28 \pm 0.01$          | $0.27 \pm 0.01$         | $0.31 \pm 0.01$          |
|                   | 1.0              | $0.28 \pm 0.01$          | $0.27 \pm 0.01$         | $0.31 \pm 0.01$          |
| 1.05              | 0.1              | $0.29 \pm 0.01$          | $0.29 \pm 0.01$         | $0.31 \pm 0.01$          |
|                   | 0.25             | $0.29 \pm 0.01$          | $0.28 \pm 0.01$         | $0.31 \pm 0.01$          |
|                   | 0.5              | $0.28 \pm 0.01$          | $0.28 \pm 0.01$         | $0.31 \pm 0.01$          |
|                   | 1.0              | $0.28 \pm 0.01$          | $0.27 \pm 0.01$         | $0.31 \pm 0.01$          |

**Tab. S10:** Self parts of Onsager coefficients for systems with hard-core interactions, volume conservation with  $U_{CV} = 1000$ , Coulomb interactions with  $U_{Coul} = 5$ , and cation-solvent interactions with  $U_{\text{cat-sol}} = -2.5$ .

| $\frac{v_0}{v_-}$ | $\frac{1}{\chi}$ | $L_+^{\text{self}}$ | $L_-^{\text{self}}$ | $L_0^{\text{self}}$ |
|-------------------|------------------|---------------------|---------------------|---------------------|
| 0.67              | 0.1              | $0.68 \pm 0.01$     | $0.98 \pm 0.01$     | $11.51 \pm 0.03$    |
|                   | 0.25             | $1.30 \pm 0.01$     | $1.88 \pm 0.01$     | $8.34 \pm 0.02$     |
|                   | 0.5              | $2.00 \pm 0.01$     | $2.63 \pm 0.01$     | $5.63 \pm 0.02$     |

|      |      |                   |                   |                  |
|------|------|-------------------|-------------------|------------------|
|      | 1.0  | $2.81 \pm 0.01$   | $3.33 \pm 0.01$   | $3.37 \pm 0.02$  |
| 0.90 | 0.1  | $0.67 \pm 0.01$   | $0.99 \pm 0.01$   | $11.55 \pm 0.04$ |
|      | 0.25 | $1.31 \pm 0.01$   | $1.89 \pm 0.01$   | $8.36 \pm 0.02$  |
|      | 0.5  | $2.02 \pm 0.01$   | $2.67 \pm 0.01$   | $5.60 \pm 0.02$  |
|      | 1.0  | $2.78 \pm 0.01$   | $3.34 \pm 0.01$   | $3.34 \pm 0.01$  |
| 1.05 | 0.1  | $0.668 \pm 0.006$ | $1.012 \pm 0.005$ | $11.59 \pm 0.03$ |
|      | 0.25 | $1.30 \pm 0.01$   | $1.89 \pm 0.01$   | $8.32 \pm 0.01$  |
|      | 0.5  | $2.01 \pm 0.01$   | $2.66 \pm 0.01$   | $5.62 \pm 0.01$  |
|      | 1.0  | $2.80 \pm 0.01$   | $3.35 \pm 0.01$   | $3.34 \pm 0.01$  |

**Tab. S11:** Distinct parts of Onsager coefficients and  $L_{-0}$  for systems with hard-core interactions, volume conservation with  $U_{CV} = 1000$ , Coulomb interactions with  $U_{Coul} = 5$ , and cation-solvent interactions with  $U_{cat-sol} = -2.5$ .

| $\frac{v_0}{v_-}$ | $\frac{1}{x}$ | $L_{++}^{\text{distinct}}$ | $L_{--}^{\text{distinct}}$ | $L_{00}^{\text{distinct}}$ | $L_{-0}$         |
|-------------------|---------------|----------------------------|----------------------------|----------------------------|------------------|
| 0.67              | 0.1           | $0.16 \pm 0.02$            | $-0.11 \pm 0.02$           | $-9.57 \pm 0.05$           | $-1.30 \pm 0.03$ |
|                   | 0.25          | $0.51 \pm 0.06$            | $-0.69 \pm 0.03$           | $-5.68 \pm 0.08$           | $-1.78 \pm 0.05$ |
|                   | 0.5           | $0.68 \pm 0.06$            | $-1.42 \pm 0.03$           | $-2.92 \pm 0.07$           | $-1.81 \pm 0.05$ |
|                   | 1.0           | $0.7 \pm 0.1$              | $-2.36 \pm 0.04$           | $-1.21 \pm 0.08$           | $-1.44 \pm 0.05$ |
| 0.90              | 0.1           | $0.13 \pm 0.02$            | $-0.06 \pm 0.04$           | $-10.40 \pm 0.06$          | $-1.04 \pm 0.04$ |
|                   | 0.25          | $0.46 \pm 0.06$            | $-0.47 \pm 0.04$           | $-6.61 \pm 0.06$           | $-1.57 \pm 0.05$ |
|                   | 0.5           | $0.44 \pm 0.08$            | $-1.18 \pm 0.06$           | $-3.76 \pm 0.07$           | $-1.65 \pm 0.06$ |
|                   | 1.0           | $0.8 \pm 0.1$              | $-1.91 \pm 0.07$           | $-1.58 \pm 0.08$           | $-1.59 \pm 0.07$ |
| 1.05              | 0.1           | $0.16 \pm 0.03$            | $-0.08 \pm 0.02$           | $-10.75 \pm 0.04$          | $-0.88 \pm 0.02$ |
|                   | 0.25          | $0.45 \pm 0.06$            | $-0.37 \pm 0.04$           | $-6.94 \pm 0.04$           | $-1.45 \pm 0.04$ |
|                   | 0.5           | $0.68 \pm 0.08$            | $-0.94 \pm 0.05$           | $-4.06 \pm 0.04$           | $-1.64 \pm 0.04$ |
|                   | 1.0           | $1.0 \pm 0.2$              | $-1.70 \pm 0.06$           | $-1.84 \pm 0.05$           | $-1.58 \pm 0.06$ |

**Tab. S12:** Jump rates of particles for systems with hard-core interactions, volume conservation with  $U_{CV} = 1000$ , Coulomb interactions with  $U_{Coul} = 5$ , and cation-solvent interactions with  $U_{cat-sol} = -2.5$ .

| $\frac{v_0}{v_-}$ | $\frac{1}{x}$ | jump rate of the cations | jump rate of the anions | jump rate of the solvent |
|-------------------|---------------|--------------------------|-------------------------|--------------------------|
| 0.67              | 0.1           | $0.20 \pm 0.01$          | $0.29 \pm 0.01$         | $0.30 \pm 0.01$          |
|                   | 0.25          | $0.22 \pm 0.01$          | $0.29 \pm 0.01$         | $0.29 \pm 0.01$          |
|                   | 0.5           | $0.24 \pm 0.01$          | $0.29 \pm 0.01$         | $0.28 \pm 0.01$          |
|                   | 1.0           | $0.25 \pm 0.01$          | $0.29 \pm 0.01$         | $0.27 \pm 0.01$          |
| 0.90              | 0.1           | $0.20 \pm 0.01$          | $0.30 \pm 0.01$         | $0.30 \pm 0.01$          |
|                   | 0.25          | $0.22 \pm 0.01$          | $0.30 \pm 0.01$         | $0.29 \pm 0.01$          |
|                   | 0.5           | $0.24 \pm 0.01$          | $0.29 \pm 0.01$         | $0.28 \pm 0.01$          |
|                   | 1.0           | $0.25 \pm 0.01$          | $0.29 \pm 0.01$         | $0.27 \pm 0.01$          |
| 1.05              | 0.1           | $0.20 \pm 0.01$          | $0.30 \pm 0.01$         | $0.30 \pm 0.01$          |
|                   | 0.25          | $0.22 \pm 0.01$          | $0.30 \pm 0.01$         | $0.29 \pm 0.01$          |
|                   | 0.5           | $0.24 \pm 0.01$          | $0.30 \pm 0.01$         | $0.28 \pm 0.01$          |
|                   | 1.0           | $0.25 \pm 0.01$          | $0.29 \pm 0.01$         | $0.26 \pm 0.01$          |

**Tab. S13:** Self parts of Onsager coefficients for systems with hard-core interactions, volume conservation with  $U_{CV} = 1000$ , Coulomb interactions with  $U_{Coul} = 5$ , and cation-solvent interactions with  $U_{cat-sol} = -7$ .

| $\frac{v_0}{v_-}$ | $\frac{1}{x}$ | $L_+^{self}$          | $L_-^{self}$    | $L_0^{self}$        |
|-------------------|---------------|-----------------------|-----------------|---------------------|
| 0.67              | 0.1           | $0.00131 \pm 0.00006$ | $1.29 \pm 0.02$ | $4.86 \pm 0.03$     |
|                   | 0.25          | $0.00207 \pm 0.00004$ | $1.08 \pm 0.01$ | $0.295 \pm 0.004$   |
|                   | 0.5           | $0.0035 \pm 0.0001$   | $0.95 \pm 0.01$ | $0.0230 \pm 0.0005$ |
|                   | 1.0           | $0.0185 \pm 0.0004$   | $1.12 \pm 0.01$ | $0.0065 \pm 0.0001$ |
| 0.90              | 0.1           | $0.00118 \pm 0.00005$ | $1.32 \pm 0.02$ | $4.83 \pm 0.01$     |
|                   | 0.25          | $0.00208 \pm 0.00003$ | $1.12 \pm 0.01$ | $0.301 \pm 0.004$   |
|                   | 0.5           | $0.0035 \pm 0.0001$   | $0.98 \pm 0.01$ | $0.0229 \pm 0.0005$ |
|                   | 1.0           | $0.0187 \pm 0.0003$   | $1.13 \pm 0.01$ | $0.0065 \pm 0.0002$ |
| 1.05              | 0.1           | $0.0013 \pm 0.0001$   | $1.33 \pm 0.01$ | $4.74 \pm 0.02$     |
|                   | 0.25          | $0.00210 \pm 0.00004$ | $1.13 \pm 0.01$ | $0.297 \pm 0.004$   |
|                   | 0.5           | $0.0035 \pm 0.0001$   | $0.99 \pm 0.01$ | $0.023 \pm 0.001$   |
|                   | 1.0           | $0.0196 \pm 0.0004$   | $1.15 \pm 0.01$ | $0.0068 \pm 0.0001$ |

**Tab. S14:** Distinct parts of Onsager coefficients and  $L_{-0}$  for systems with hard-core interactions, volume conservation with  $U_{CV} = 1000$ , Coulomb interactions with  $U_{Coul} = 5$ , and cation-solvent interactions with  $U_{cat-sol} = -7$ .

| $\frac{v_0}{v_-}$ | $\frac{1}{x}$ | $L_{++}^{distinct}$ | $L_{--}^{distinct}$ | $L_{00}^{distinct}$ | $L_{-0}$             |
|-------------------|---------------|---------------------|---------------------|---------------------|----------------------|
| 0.67              | 0.1           | $0.0004 \pm 0.0001$ | $-0.42 \pm 0.05$    | $-2.9 \pm 0.1$      | $-1.30 \pm 0.07$     |
|                   | 0.25          | $0.0008 \pm 0.0001$ | $-0.96 \pm 0.01$    | $-0.03 \pm 0.01$    | $-0.18 \pm 0.01$     |
|                   | 0.5           | $0.0012 \pm 0.0002$ | $-0.93 \pm 0.01$    | $0.006 \pm 0.001$   | $-0.019 \pm 0.001$   |
|                   | 1.0           | $0.006 \pm 0.001$   | $-1.12 \pm 0.01$    | $0.0032 \pm 0.0003$ | $-0.0064 \pm 0.0002$ |
| 0.90              | 0.1           | $0.0005 \pm 0.0002$ | $-0.21 \pm 0.04$    | $-3.45 \pm 0.05$    | $-1.23 \pm 0.04$     |
|                   | 0.25          | $0.0006 \pm 0.0001$ | $-0.92 \pm 0.02$    | $-0.05 \pm 0.01$    | $-0.23 \pm 0.01$     |
|                   | 0.5           | $0.0013 \pm 0.0003$ | $-0.95 \pm 0.01$    | $0.003 \pm 0.001$   | $-0.023 \pm 0.001$   |
|                   | 1.0           | $0.005 \pm 0.001$   | $-1.12 \pm 0.01$    | $0.0027 \pm 0.0004$ | $-0.0082 \pm 0.0003$ |
| 1.05              | 0.1           | $0.0005 \pm 0.0001$ | $-0.20 \pm 0.03$    | $-3.77 \pm 0.05$    | $-1.02 \pm 0.04$     |
|                   | 0.25          | $0.0008 \pm 0.0001$ | $-0.78 \pm 0.01$    | $-0.07 \pm 0.01$    | $-0.24 \pm 0.01$     |
|                   | 0.5           | $0.0011 \pm 0.0002$ | $-0.97 \pm 0.01$    | $0.004 \pm 0.001$   | $-0.028 \pm 0.001$   |
|                   | 1.0           | $0.006 \pm 0.001$   | $-0.99 \pm 0.01$    | $0.0030 \pm 0.0004$ | $-0.0103 \pm 0.0004$ |

**Tab. S15:** Jump rates of particles for systems with hard-core interactions, volume conservation with  $U_{CV} = 1000$ , Coulomb interactions with  $U_{Coul} = 5$ , and cation-solvent interactions with  $U_{cat-sol} = -7$ .

| $\frac{v_0}{v_-}$ | $\frac{1}{x}$ | jump rate of the cations | jump rate of the anions | jump rate of the solvent |
|-------------------|---------------|--------------------------|-------------------------|--------------------------|
| 0.67              | 0.1           | $0.01 \pm 0.01$          | $0.40 \pm 0.01$         | $0.17 \pm 0.01$          |
|                   | 0.25          | $0.01 \pm 0.01$          | $0.31 \pm 0.01$         | $0.08 \pm 0.01$          |
|                   | 0.5           | $0.02 \pm 0.01$          | $0.25 \pm 0.01$         | $0.04 \pm 0.01$          |
|                   | 1.0           | $0.04 \pm 0.01$          | $0.22 \pm 0.01$         | $0.03 \pm 0.01$          |
| 0.90              | 0.1           | $0.01 \pm 0.01$          | $0.41 \pm 0.01$         | $0.17 \pm 0.01$          |
|                   | 0.25          | $0.01 \pm 0.01$          | $0.31 \pm 0.01$         | $0.07 \pm 0.01$          |

|      |      |                 |                 |                 |
|------|------|-----------------|-----------------|-----------------|
|      | 0.5  | $0.02 \pm 0.01$ | $0.25 \pm 0.01$ | $0.04 \pm 0.01$ |
|      | 1.0  | $0.04 \pm 0.01$ | $0.22 \pm 0.01$ | $0.03 \pm 0.01$ |
| 1.05 | 0.1  | $0.01 \pm 0.01$ | $0.41 \pm 0.01$ | $0.19 \pm 0.01$ |
|      | 0.25 | $0.01 \pm 0.01$ | $0.31 \pm 0.01$ | $0.07 \pm 0.01$ |
|      | 0.5  | $0.02 \pm 0.01$ | $0.25 \pm 0.01$ | $0.04 \pm 0.01$ |
|      | 1.0  | $0.04 \pm 0.01$ | $0.22 \pm 0.01$ | $0.03 \pm 0.01$ |

### Composition-dependent Onsager coefficients for systems with $\frac{v_0}{v_-} = 0.67$

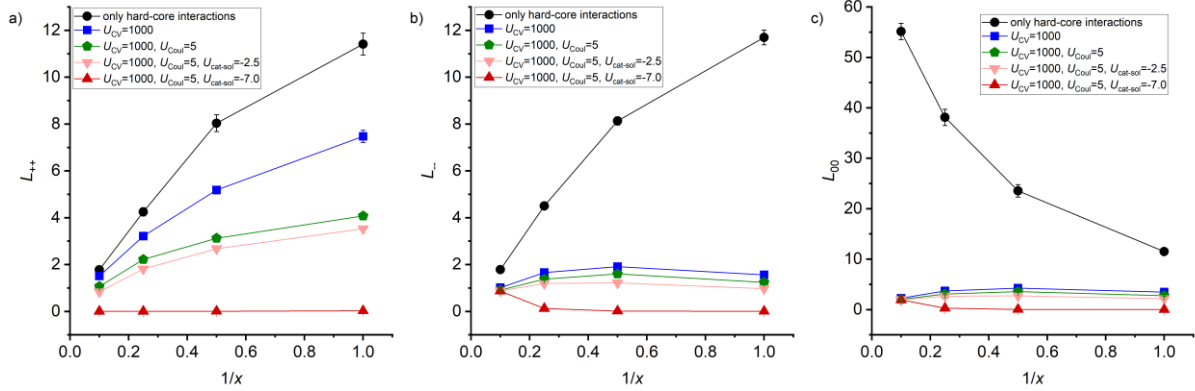

**Fig. S6:** Plots of the Onsager coefficients  $L_{++}$ ,  $L_{--}$  and  $L_{00}$  vs. molar ratio  $1/x$  for different energy parameters.

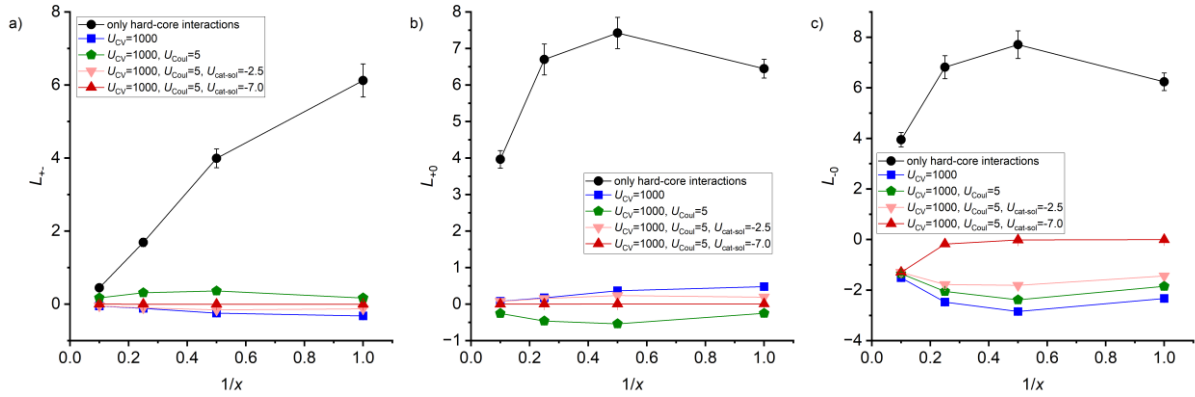

**Fig. S7:** Plots of the Onsager coefficients  $L_{+-}$ ,  $L_{+0}$  and  $L_{-0}$  vs. molar ratio  $1/x$  for different energy parameters.

## Composition-dependent diffusion coefficients and correlation parameters for systems with $\frac{v_0}{v_-} = 0.90$

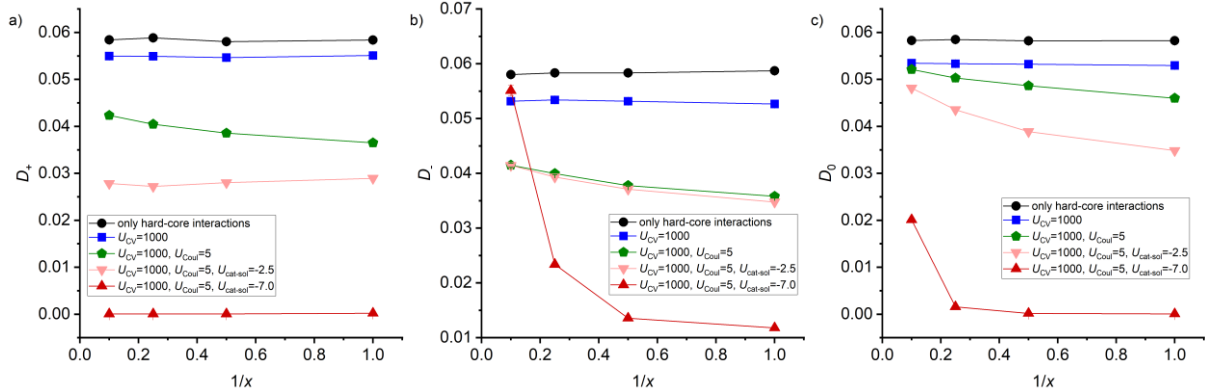

**Fig. S8:** Plots of the diffusion coefficients of  $D_+$ ,  $D_-$ , and  $D_0$  vs. the molar ratio  $1/x$  for different energy parameters.

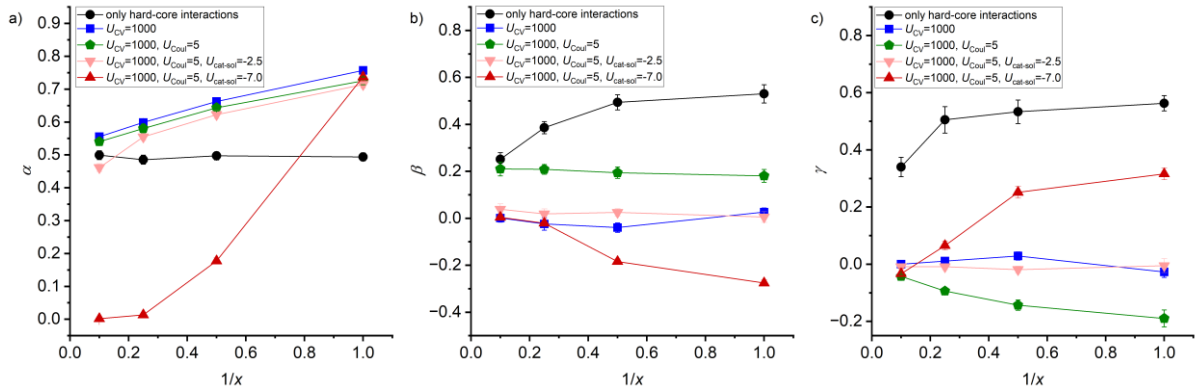

**Fig. S9:** Plots of correlation parameters  $\alpha$ ,  $\beta$  and  $\gamma$  vs. the molar ratio  $1/x$  for different energy parameters.

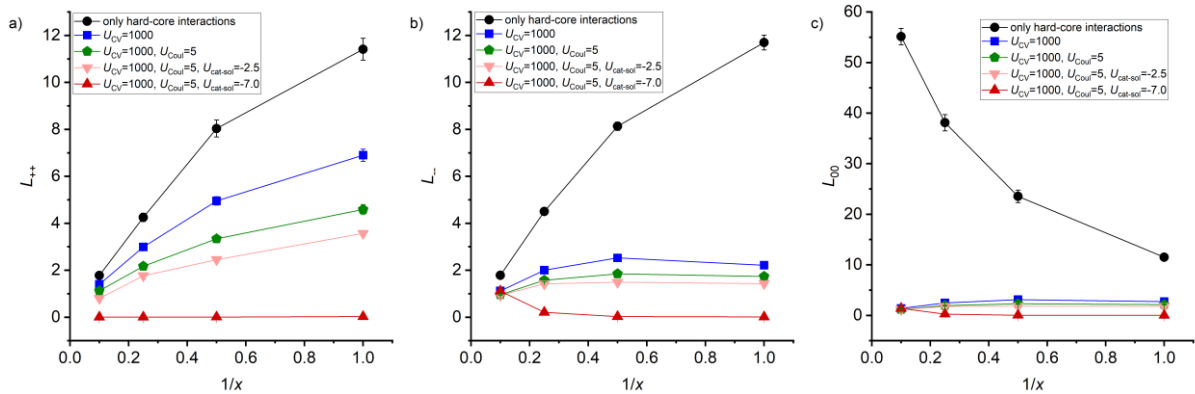

**Fig. S10:** Plots of the Onsager coefficients  $L_{++}$ ,  $L_{--}$ , and  $L_{00}$  vs. the molar ratio  $1/x$  for different energy parameters.

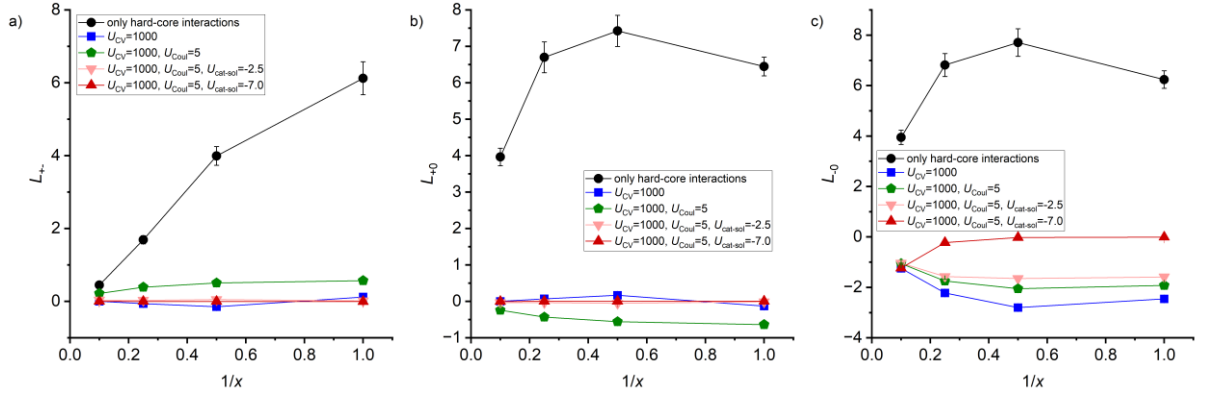

**Fig. S11:** Plots of the Onsager coefficients  $L_{+-}$ ,  $L_{+0}$ , and  $L_{-0}$  vs. the molar ratio  $1/x$  for different energy parameters.

### Composition-dependent diffusion coefficients and correlation parameters for systems with $\frac{v_0}{v_-} = 1.05$

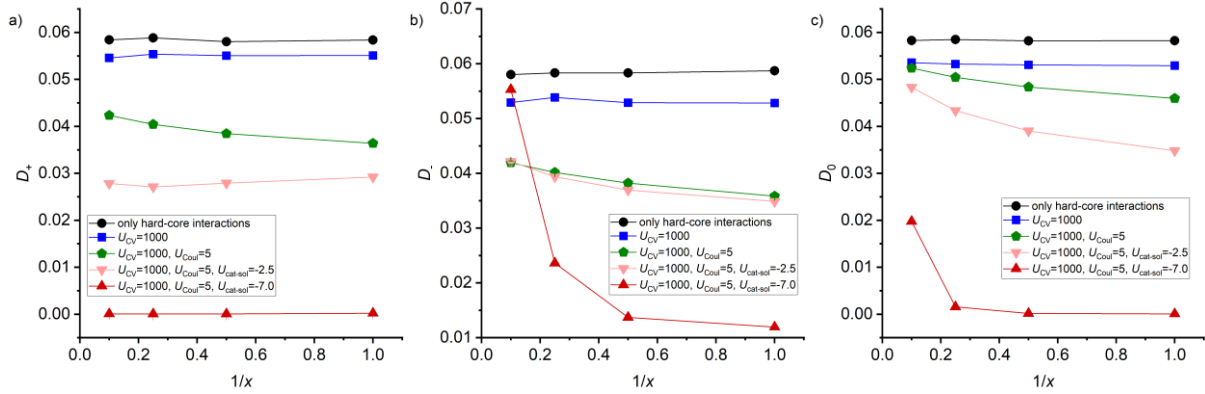

**Fig. S12:** Plots of the diffusion coefficients of  $D_{+}$ ,  $D_{-}$ , and  $D_0$  vs. the molar ratio  $1/x$  for different energy parameters.

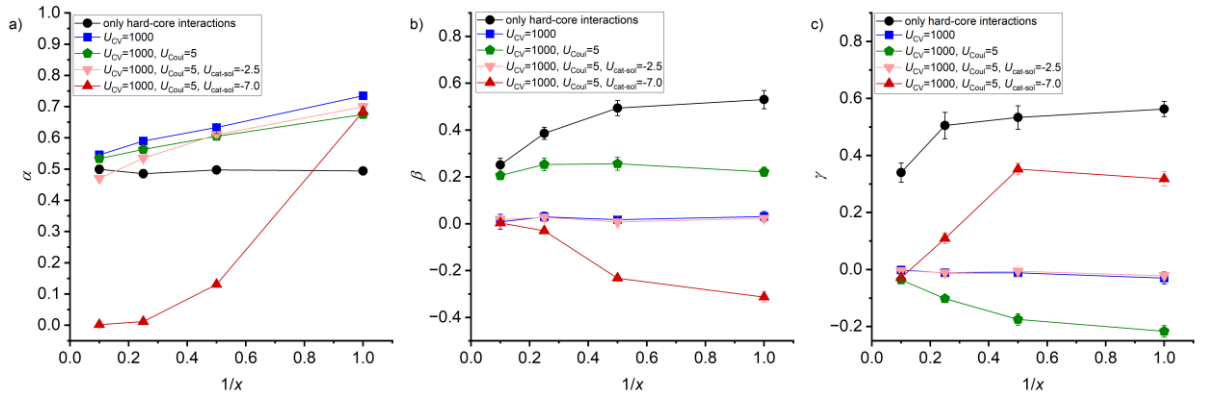

**Fig. S13:** Plots of correlation parameters  $\alpha$ ,  $\beta$  and  $\gamma$  vs. the molar ratio  $1/x$  for different energy parameters.

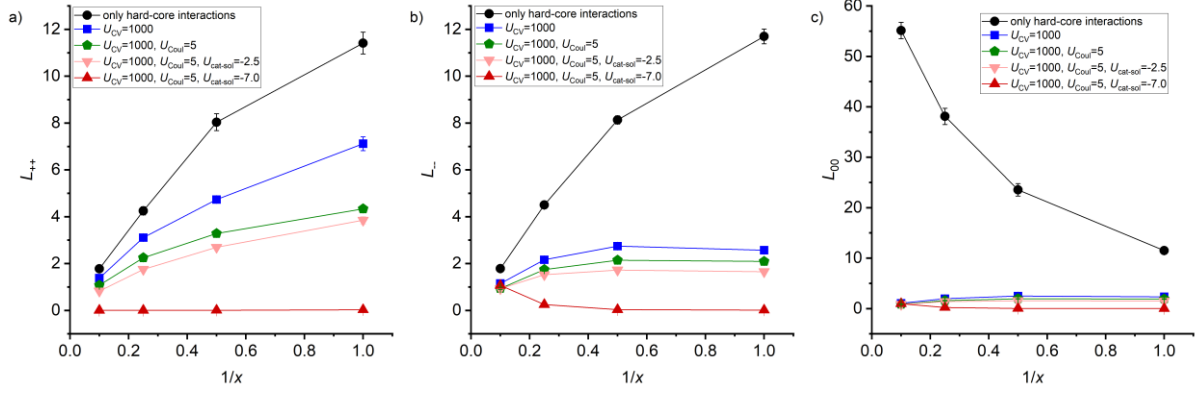

**Fig. S14:** Plots of the Onsager coefficients  $L_{++}$ ,  $L_{--}$ , and  $L_{00}$  vs. the molar ratio  $1/x$  for different energy parameters.

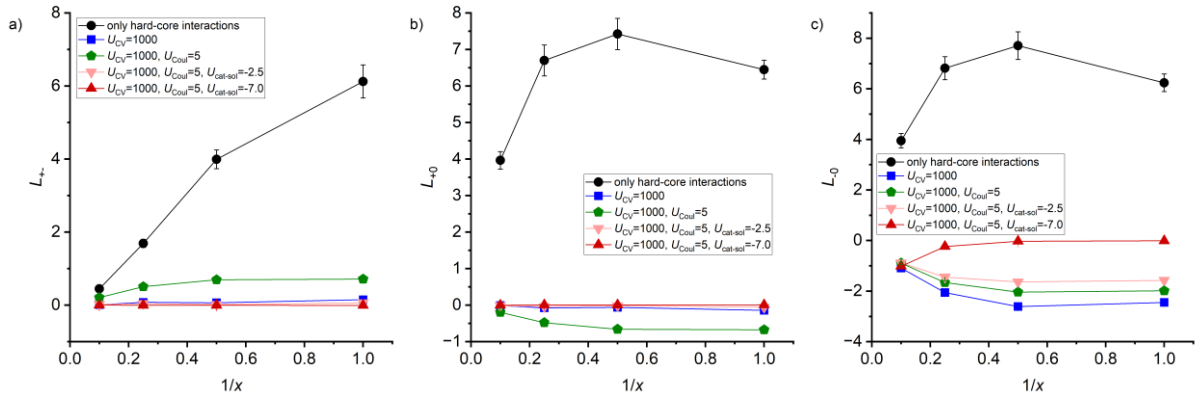

**Fig. S15:** Plots of the Onsager coefficients  $L_{+-}$ ,  $L_{+0}$ , and  $L_{-0}$  vs. the molar ratio  $1/x$  for different energy parameters.

### Simulation results for different energy penalty parameter for center-of-volume shifts $U_{CV}$

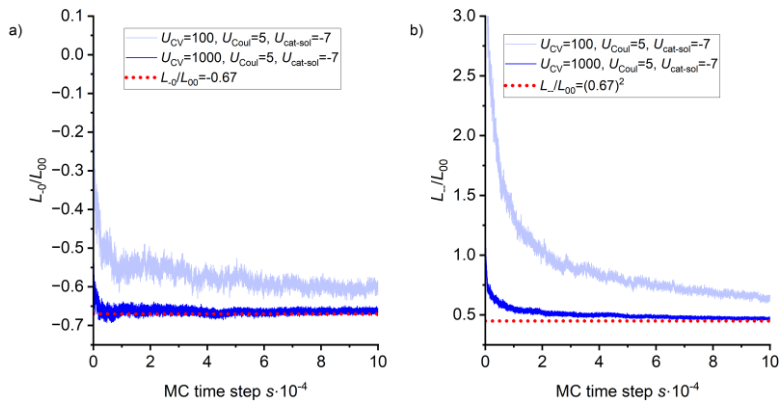

**Fig. S16:** Time-dependent ratio of the Onsager coefficients (a)  $L_{-0}/L_{00}$  and (b)  $L_{--}/L_{00}$  for a system with a molar ratio of  $1/x = 0.5$  and with different values of  $U_{CV}$ . For comparison, theoretical results for strict volume conservation are shown as dotted lines. Volume conservation is considered as sufficiently strict, if the mean value of the ratios  $L_{-0}/L_{00}$  and (b)

$L_{--}/L_{00}$  deviate by less than 5% from the predictions of Eq. (17) and (18) over the last  $3 \cdot 10^4$  MC time steps of the equilibrium simulations.

### Influence of the volume ratio $v_0/v_-$ on the parameter $\alpha$

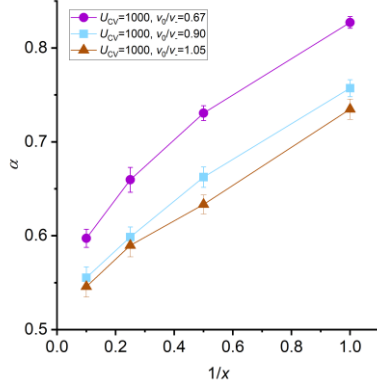

**Fig. S17:** Plot of the parameter  $\alpha$  vs. the molar ratio  $1/x$  for the systems with only volume conservation and different volume ratios  $v_0/v_-$ .

### Derivation of Eq. (20) for analyzing the relative contributions of anions and solvent molecules to volume conservation

The sum over all displacement vectors of the anions is given by:

$$\sum_i^{N_-} \Delta \vec{r}_i(t) \quad (\text{S1})$$

The sum over all displacement vectors of the solvent molecules is given by:

$$\sum_j^{x \cdot N_-} \Delta \vec{r}_j(t) \quad (\text{S2})$$

In the case of strict volume conservation, the following equation must hold:

$$\frac{v_-}{v_0} \cdot \sum_i^{N_-} \Delta \vec{r}_i(t) = - \sum_j^{x \cdot N_-} \Delta \vec{r}_j(t) \quad (\text{S3})$$

which can be rewritten as:

$$\frac{v_-}{v_0} \cdot \sum_i^{N_-} \Delta \vec{r}_i(t) + \sum_j^{x \cdot N_-} \Delta \vec{r}_j(t) = 0 \quad (\text{S4})$$

In Monte Carlo units, the displacement vectors of the species  $i$  and  $j$  are linked to the transport coefficients  $L_{ij}$  by:

$$L_{ij} = \lim_{t \rightarrow \infty} \frac{d}{dt} \left[ \left( \sum_i^{N_i} \Delta \vec{r}_i(t) \right) \left( \sum_j^{N_j} \Delta \vec{r}_j(t) \right) \right] \quad (\text{S5})$$

Squaring Eq. (S4) yields:

$$\left(\frac{v_-}{v_0}\right)^2 \cdot \left[ \left( \sum_i^{N_-} \Delta \vec{r}_i(t) \right)^2 \right] + \left[ \left( \sum_j^{x \cdot N_-} \Delta \vec{r}_j(t) \right)^2 \right] - 2 \cdot \frac{v_-}{v_0} \cdot \sum_i^{N_-} \Delta \vec{r}_i(t) \cdot \sum_j^{x \cdot N_-} \Delta \vec{r}_j(t) = 0 \quad (\text{S6})$$

Taking into account Eq. (S5) results in:

$$\left(\frac{v_-}{v_0}\right)^2 \cdot L_{--} + L_{00} + 2 \cdot \frac{v_-}{v_0} L_{-0} = 0 \quad (\text{S7})$$

$$\frac{v_-}{v_0} \cdot L_{--} + \frac{v_0}{v_-} L_{00} + 2 \cdot L_{-0} = 0 \quad (\text{S8})$$

Next the Onsager coefficients  $L_{--}$  and  $L_{00}$  are split into self and distinct parts:

$$\frac{v_-}{v_0} \cdot L_{--}^{\text{self}} + \frac{v_0}{v_-} L_{00}^{\text{self}} + \frac{v_-}{v_0} \cdot L_{--}^{\text{distinct}} + \frac{v_0}{v_-} L_{00}^{\text{distinct}} + 2 \cdot L_{-0} = 0 \quad (\text{S9})$$

and the equation is divided by  $\left(\frac{v_-}{v_0} \cdot L_{--}^{\text{self}} + \frac{v_0}{v_-} L_{00}^{\text{self}}\right)$ :

$$0 = \frac{\frac{v_-}{v_0} \cdot L_{--}^{\text{self}} + \frac{v_0}{v_-} L_{00}^{\text{self}}}{\frac{v_-}{v_0} \cdot L_{--}^{\text{self}} + \frac{v_0}{v_-} L_{00}^{\text{self}}} + \frac{\frac{v_-}{v_0} \cdot L_{--}^{\text{distinct}}}{\frac{v_-}{v_0} \cdot L_{--}^{\text{self}} + \frac{v_0}{v_-} L_{00}^{\text{self}}} + \frac{\frac{v_0}{v_-} L_{00}^{\text{distinct}}}{\frac{v_-}{v_0} \cdot L_{--}^{\text{self}} + \frac{v_0}{v_-} L_{00}^{\text{self}}} + \frac{2 \cdot L_{-0}}{\frac{v_-}{v_0} \cdot L_{--}^{\text{self}} + \frac{v_0}{v_-} L_{00}^{\text{self}}} \quad (\text{S10})$$

$$0 = 1 + \frac{L_{--}^{\text{distinct}}}{L_{--}^{\text{self}} + \left(\frac{v_0}{v_-}\right)^2 L_{00}^{\text{self}}} + \frac{\left(\frac{v_0}{v_-}\right)^2 L_{00}^{\text{distinct}}}{L_{--}^{\text{self}} + \left(\frac{v_0}{v_-}\right)^2 L_{00}^{\text{self}}} + \frac{2 \frac{v_0}{v_-} \cdot L_{-0}}{L_{--}^{\text{self}} + \left(\frac{v_0}{v_-}\right)^2 L_{00}^{\text{self}}} \quad (\text{S11})$$

Finally, we obtain:

$$-1 = \frac{L_{--}^{\text{distinct}}}{L_{--}^{\text{self}} + \left(\frac{v_0}{v_-}\right)^2 L_{00}^{\text{self}}} + \frac{\left(\frac{v_0}{v_-}\right)^2 L_{00}^{\text{distinct}}}{L_{--}^{\text{self}} + \left(\frac{v_0}{v_-}\right)^2 L_{00}^{\text{self}}} + \frac{2 \frac{v_0}{v_-} \cdot L_{-0}}{L_{--}^{\text{self}} + \left(\frac{v_0}{v_-}\right)^2 L_{00}^{\text{self}}} \quad (\text{20})$$

**Relative contributions to the volume conservation for systems with  $\frac{v_0}{v_-} = 0.9$**

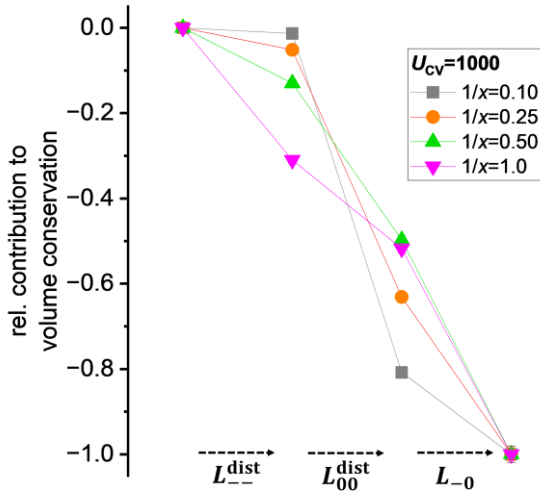

**Fig. S18:** Relative contributions of  $L_{--}^{\text{dist}}$ ,  $L_{00}^{\text{dist}}$  and  $L_{-0}$  to volume conservation for different molar ratios  $1/x$  in systems with hard-core interactions between the particles and with strict volume conservation ( $U_{\text{CV}} = 1000$ ) at a volume ratio of  $v_0/v_- = 0.90$ .

### Derivation of Eq. (23) for the ratio $L_{\text{salt}} / L_{\text{ion}}$

The combination of equations (23) and (24) yields:

$$\frac{L_{\text{salt}}}{L_{\text{ion}}} = \frac{L_{++} \cdot L_{--} - L_{+-}^2}{(L_{++} + L_{--} - 2L_{+-})^2} \quad (\text{S12})$$

Dividing all Onsager coefficients in Eq. (S12) by  $(L_{++} + L_{--})$  and taking into account that

$$\alpha = \frac{L_{++}}{L_{++} + L_{--}} \quad (14)$$

$$1 - \alpha = \frac{L_{--}}{L_{++} + L_{--}} \quad (\text{S13})$$

$$\beta = \frac{2 \cdot L_{+-}}{L_{++} + L_{--}} \quad (15)$$

results in:

$$\frac{L_{\text{salt}}}{L_{\text{ion}}} = \frac{\alpha(1 - \alpha) - (0.5 \cdot \beta)^2}{(1 - \beta)^2} \quad (23)$$

### Comparison of two different cutoffs for the attractive cation-solvent interaction for systems with $\frac{v_0}{v_-} = 0.67$

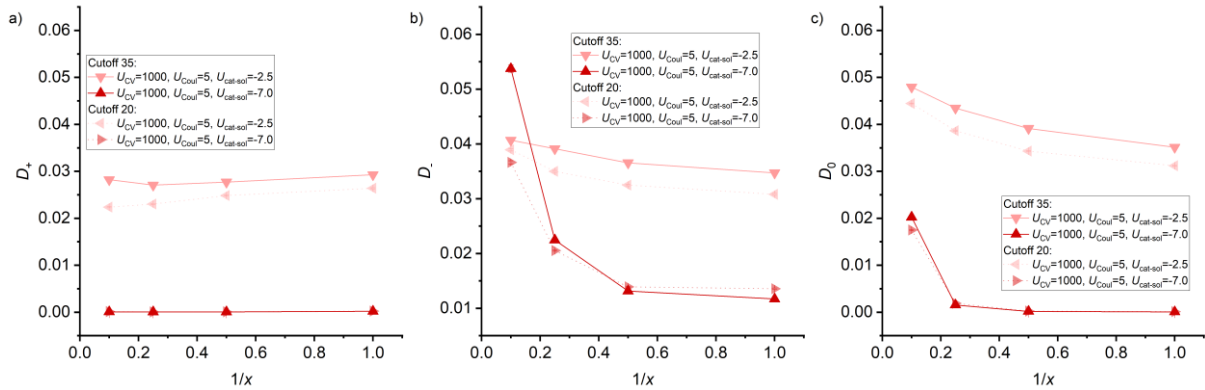

**Fig. S19:** Plots of the diffusion coefficients of  $D_+$ ,  $D_-$ , and  $D_0$  vs. the molar ratio  $1/x$  for different cutoffs for the attractive cation-solvent interaction.

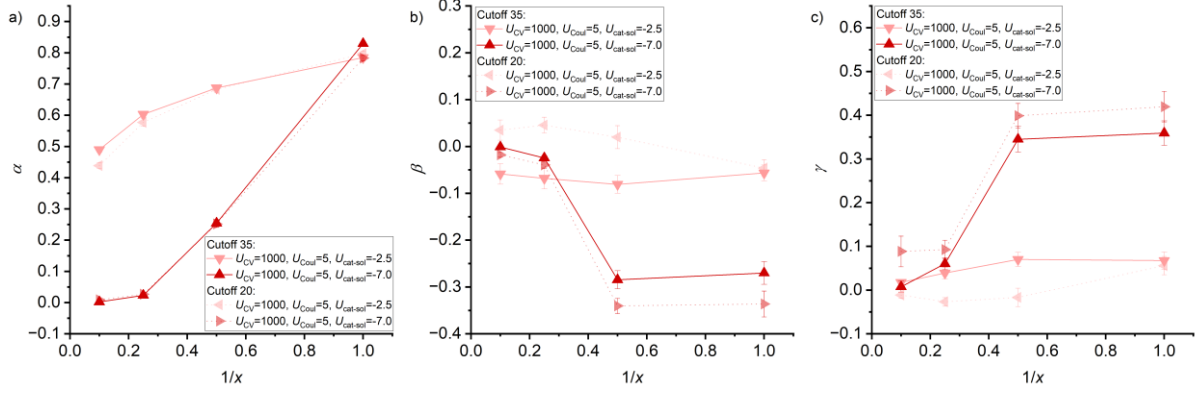

**Fig. S20:** Plots of correlation parameters  $\alpha$ ,  $\beta$  and  $\gamma$  vs. the molar ratio  $1/x$  for different cutoffs for the attractive cation-solvent interaction.

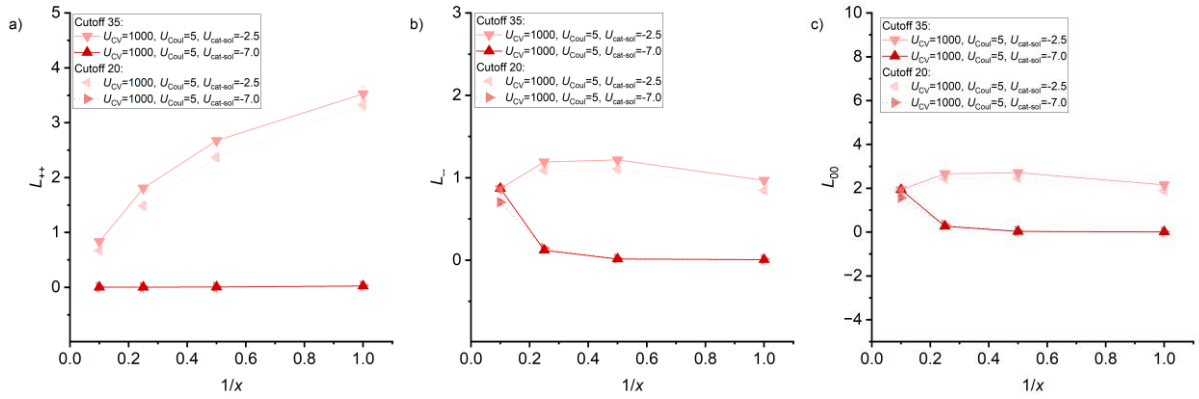

**Fig. S21:** Plots of the Onsager coefficients  $L_{++}$ ,  $L_{--}$ , and  $L_{00}$  vs. the molar ratio  $1/x$  for different cutoffs for the attractive cation-solvent interaction.

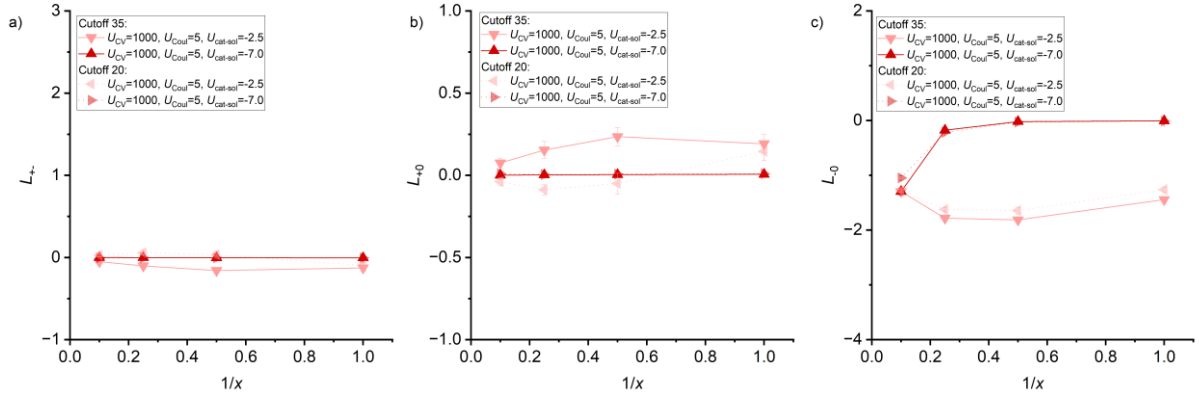

**Fig. S22:** Plots of the Onsager coefficients  $L_{+-}$ ,  $L_{+0}$ , and  $L_{-0}$  vs. the molar ratio  $1/x$  for different cutoffs for the attractive cation-solvent interaction.

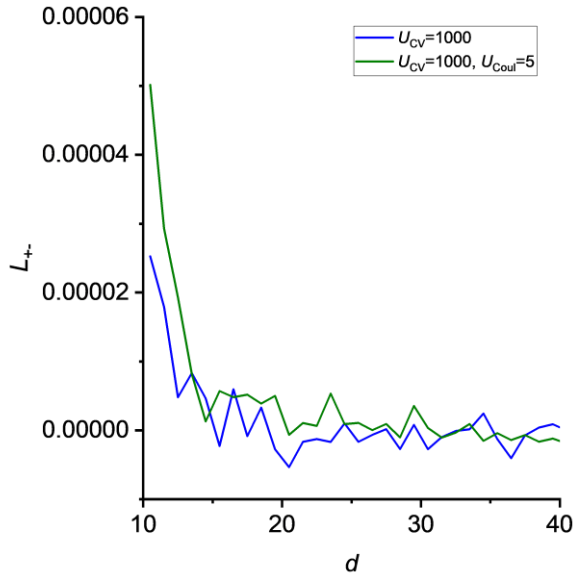

**Fig. S23:** Dependence of the Onsager coefficient  $L_{+-}$  on the initial cation-anion distance  $d$  for two systems with a molar ratio of  $1/x = 1$ ,  $\frac{v_0}{v_-} = 0.67$  and with strict volume conservation ( $U_{CV} = 1000$ ). Coulomb interactions with  $U_{Coul} = 5$  lead to enhanced positive cation-anion correlations when the initial separation distance of cations and anion is small.

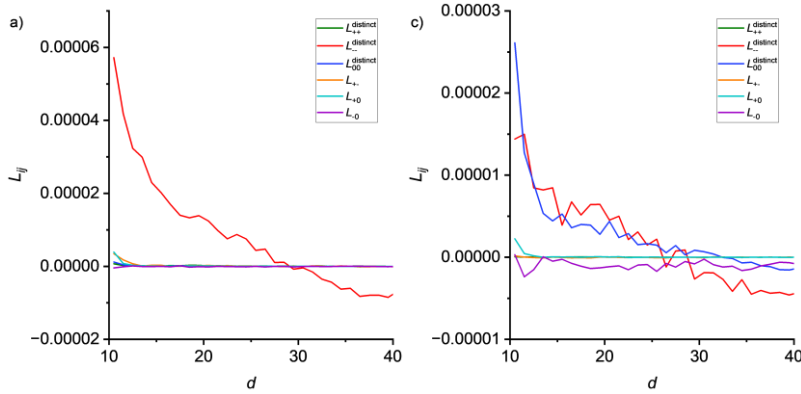

**Fig. S24:** Dependence of Onsager coefficients  $L_{++}^{\text{distinct}}$ ,  $L_{--}^{\text{distinct}}$ ,  $L_{00}^{\text{distinct}}$ ,  $L_{+-}$ ,  $L_{+0}$ , and  $L_{-0}$  on the initial distance between the respective particles,  $d$ , for systems with a molar ratio of a)  $1/x = 1$  and of b)  $1/x = 0.25$  and  $\frac{v_0}{v_-} = 0.67$  with hard-core interactions, volume conservation with  $U_{CV} = 1000$ , Coulomb interactions with  $U_{Coul} = 5$ , and cation-solvent interactions with  $U_{\text{cat-sol}} = -7$ .
